# Supplementary material for: Self-assembly and characterization of copper 3,4-pyridinedicarboxylate complexes based on a variety of polynuclear hydroxo clusters
Source: Royal Society of Chemistry journal article supplement (doi:10.1039/c0dt00917b), 2011-01-01
Supplement: c0dt00917b.pdf [file c0dt00917b.pdf]

**Table S1** Hydrogen bond geometry parameters (Å, °) for complex **1**

| D-H...A                | d(D-H) | d(H...A) | d(D...A) | <(DHA) |
|------------------------|--------|----------|----------|--------|
| O(1)-H(1A)...O(10)     | 0.85   | 2.05     | 2.892(3) | 170.6  |
| O(2)-H(2A)...O(18)#3   | 0.85   | 2.04     | 2.882(3) | 169.8  |
| O(3)-H(3A)...O(10)     | 0.85   | 1.88     | 2.724(3) | 173.1  |
| O(4)-H(4A)...O(13)#3   | 0.85   | 2.18     | 3.023(3) | 175.3  |
| O(13)-H(13A)...O(7)#4  | 0.85   | 1.86     | 2.652(4) | 153.6  |
| O(13)-H(13B)...O(17)   | 0.85   | 2.37     | 3.037(6) | 135.2  |
| O(13)-H(13B)...O(15)   | 0.85   | 2.40     | 2.853(4) | 114.0  |
| O(14)-H(14A)...O(3)    | 0.85   | 1.92     | 2.750(3) | 166.5  |
| O(14)-H(14B)...O(20)#2 | 0.85   | 1.98     | 2.784(4) | 156.6  |
| O(15)-H(15B)...O(11)   | 0.85   | 1.98     | 2.799(4) | 161.8  |
| O(16)-H(16A)...O(9)    | 0.85   | 1.90     | 2.735(4) | 168.1  |
| O(16)-H(16B)...O(14)   | 0.85   | 2.25     | 2.895(4) | 133.0  |
| O(17)-H(17A)...O(12)   | 0.85   | 1.94     | 2.790(6) | 177.3  |
| O(18)-H(18A)...O(12)   | 0.85   | 1.92     | 2.743(4) | 164.1  |
| O(18)-H(18B)...O(22)#5 | 0.85   | 1.94     | 2.777(5) | 167.9  |
| O(19)-H(19A)...O(14)#1 | 0.85   | 2.18     | 3.008(4) | 166.3  |
| O(19)-H(19B)...O(16)#6 | 0.85   | 2.15     | 2.882(4) | 144.8  |
| O(20)-H(20B)...N(10)   | 0.85   | 2.11     | 2.951(5) | 168.3  |
| O(20)-H(20A)...O(21)#1 | 0.85   | 2.31     | 2.849(7) | 121.1  |
| O(21)-H(21A)...O(15)   | 0.85   | 2.51     | 3.061(7) | 123.0  |
| O(22)-H(22A)...O(21)#3 | 0.85   | 2.49     | 2.965(8) | 116.0  |

#1 x, y-1, z #2 x, y+1, z #3 x-1, y, z #4 x+1, y, z #5 x+1, y-1, z #6 -x+2, -y+1, -z

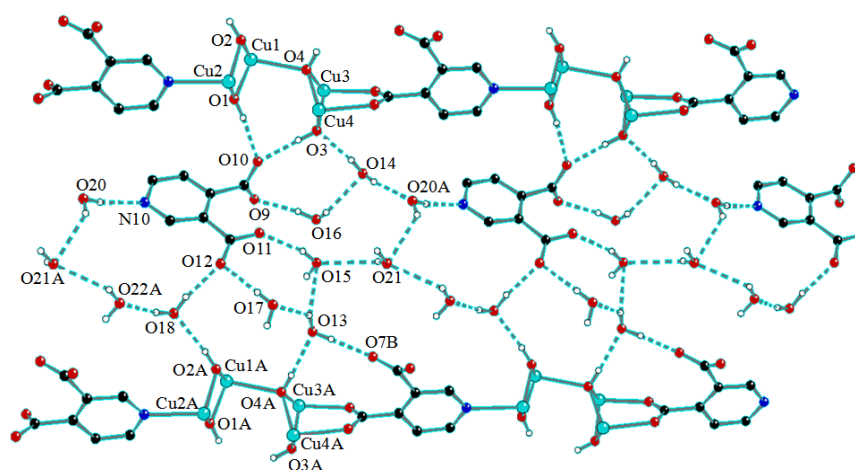

**Fig. S1** Hydrogen bonds between two 1-D chains in complex **1**, phen molecules and H atoms in PDC are omitted for clarity.

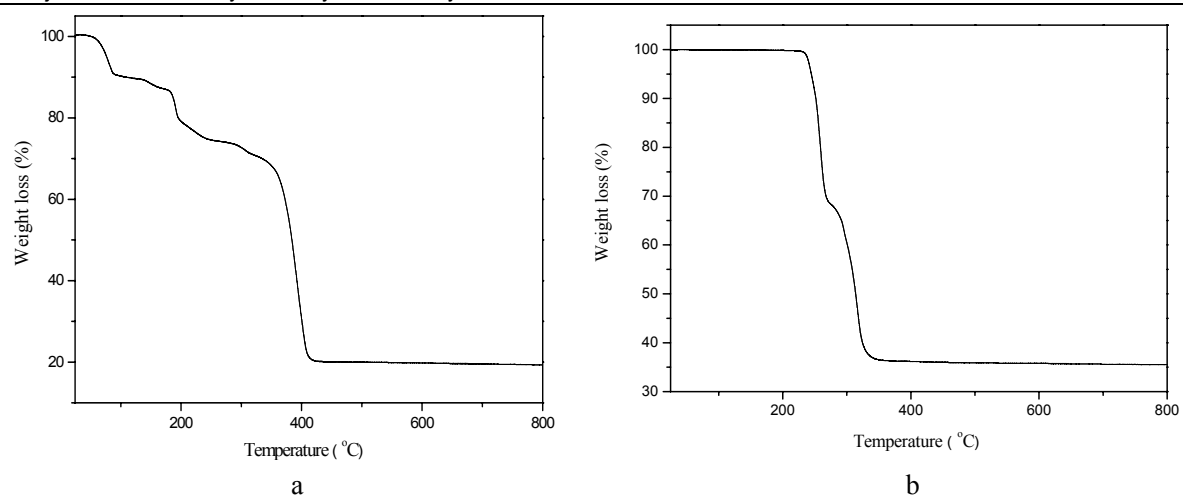

Fig.S2 TG curves of complexes 1(a) and 4 (b).
